# Supplementary material for: Strong green upconversion emission from submicron spindle-shaped SrMoO4:Yb3+,Er3+
Source: Royal Society of Chemistry journal article supplement (doi:10.1039/d3dt03213b), 2023-11-30
Supplement: d3dt03213b1.pdf [file d3dt03213b1.pdf]

## Supporting Information

### **Strong green upconversion emission from submicron spindle-shaped SrMoO<sub>4</sub>:Yb<sup>3+</sup>,Er<sup>3+</sup>**

Thulitha M. Abeywickrama and Yuanbing Mao\*

Department of Chemistry, Illinois Institute of Technology, 3105 South Dearborn Street, Chicago,  
IL 60616, USA

\*To whom correspondence should be addressed. Email: ymao17@iit.edu, Tel.: +1-312-567-3815

### **Solid state sample preparation for SrMoO<sub>4</sub>:1Yb<sup>3+</sup>,1Er<sup>3+</sup>**

Solid state SrMoO<sub>4</sub>:1% Yb<sup>3+</sup>,1%Er<sup>3+</sup> were prepared modified solid-state reaction. For this purpose SrCO<sub>3</sub>, MoO<sub>3</sub>, Yb<sub>2</sub>O<sub>3</sub> (from Sigma-Aldrich), and Er(NO<sub>3</sub>)<sub>3</sub> (from Alfa Aesar) of high purity (99.9+%) in stoichiometric proportions were mixed in a mortar for and ground for 30 minutes. The initial calcination step was carried out at 350°C for 3 h, and the powder mixture was then ground again for 30 minutes and further sintered at 950°C for 6 h. The XRD pattern and SEM of the as-prepared sample is provided in Figure S5 below.

## Particle size from Scherrer equation

$$D = \frac{K\lambda}{\beta \cos\theta}$$

D = particle size (nm)  
 K = Scherrer constant (0.9)  
 $\lambda$  = wavelength of X-ray source (0.15406)  
 $\beta$  = FWHM (radian)  
 $\theta$  = peak position (radian)

| Time/h | Average Particle size (nm) |
|--------|----------------------------|
| 4      | 26.1 ± 5.5                 |
| 6      | 26.4 ± 6.03                |
| 7      | 22.2 ± 8.04                |
| 10     | 26.2 ± 5.21                |
| 24     | 25.5 ± 6.08                |

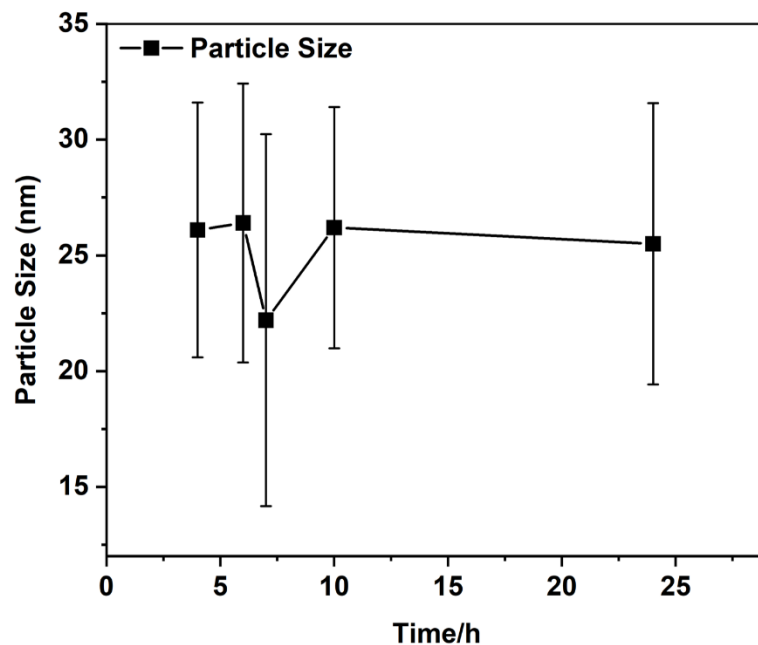

**Figure S1.** Particle/grain size calculation from FWHM of XRD peaks using the Scherrer equation of SMO doped with 1% Yb<sup>3+</sup> and 1% Er<sup>3+</sup> synthesized at different HT reaction times. Average particle size is presented along with the standard deviation for each calculation.

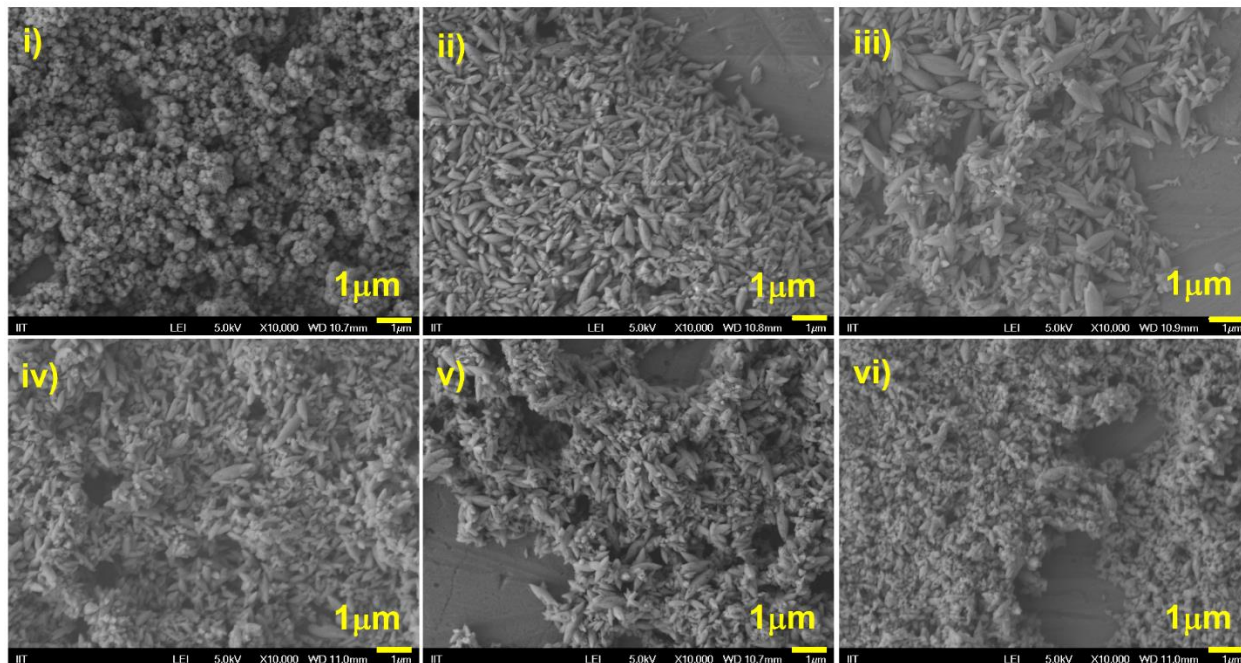

**Figure S2.** FE-SEM images of the SMO samples doped with 1%  $\text{Yb}^{3+}$  and 1%  $\text{Er}^{3+}$  as synthesized at different pH conditions: (i) pH 7, (ii) pH 8, (iii) pH 9, (iv) pH 9.5, (v) pH 10, and (vi) pH 11.

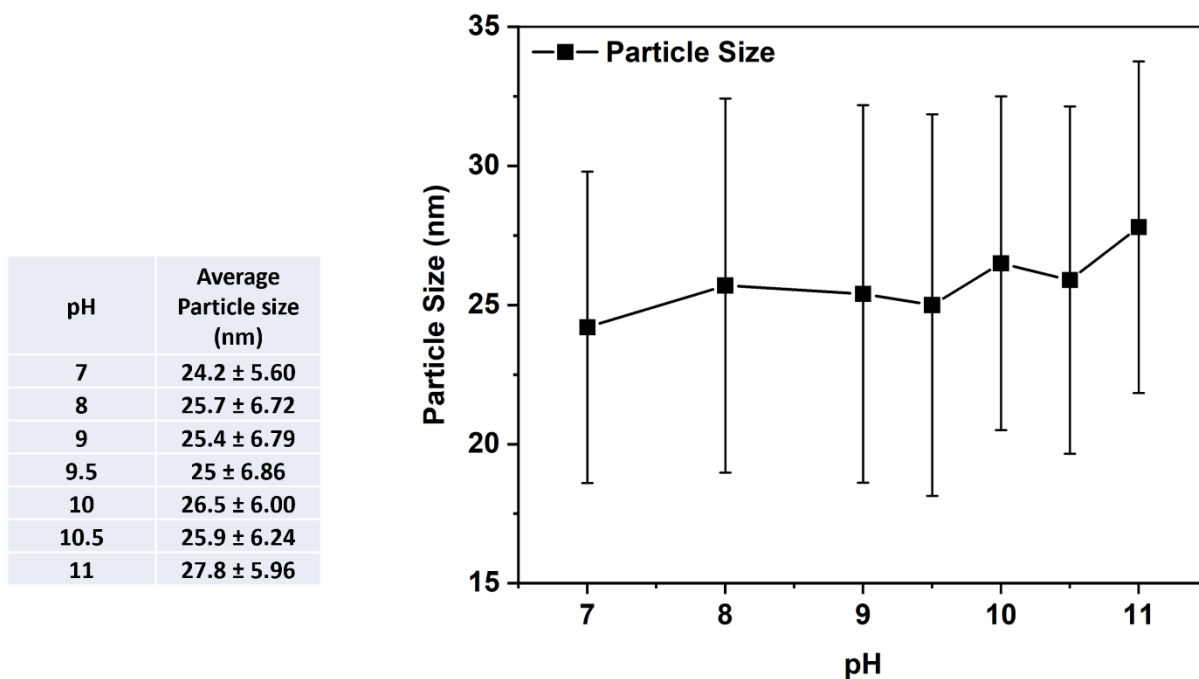

**Figure S3.** Particle size calculation from FWHM of XRD peaks using Scherrer equation of SMO doped with 1%  $\text{Yb}^{3+}$  and 1%  $\text{Er}^{3+}$  synthesized at different pH conditions. Average particle size is presented along with the standard deviation for each calculation.

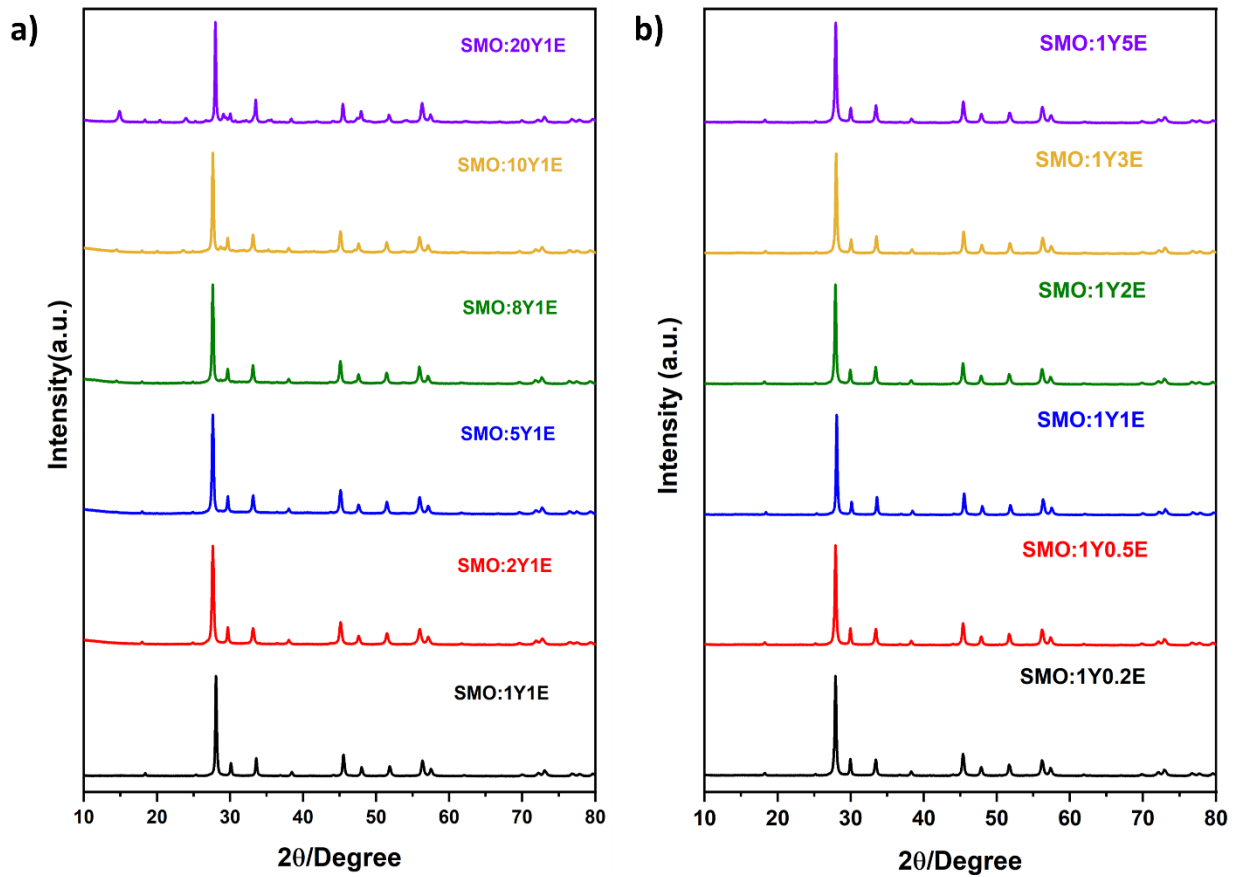

**Figure S4.** XRD patterns of SrMoO<sub>4</sub>:x%Y<sup>3+</sup>,y%Er<sup>3+</sup> samples with varying Yb<sup>3+</sup> and Er<sup>3+</sup> doping levels: (a) x = 1, 2, 5, 8, 10, 20 with y = 1%. (b) y = 0.2, 0.5, 1, 2, 3, and 5 with x = 1%.

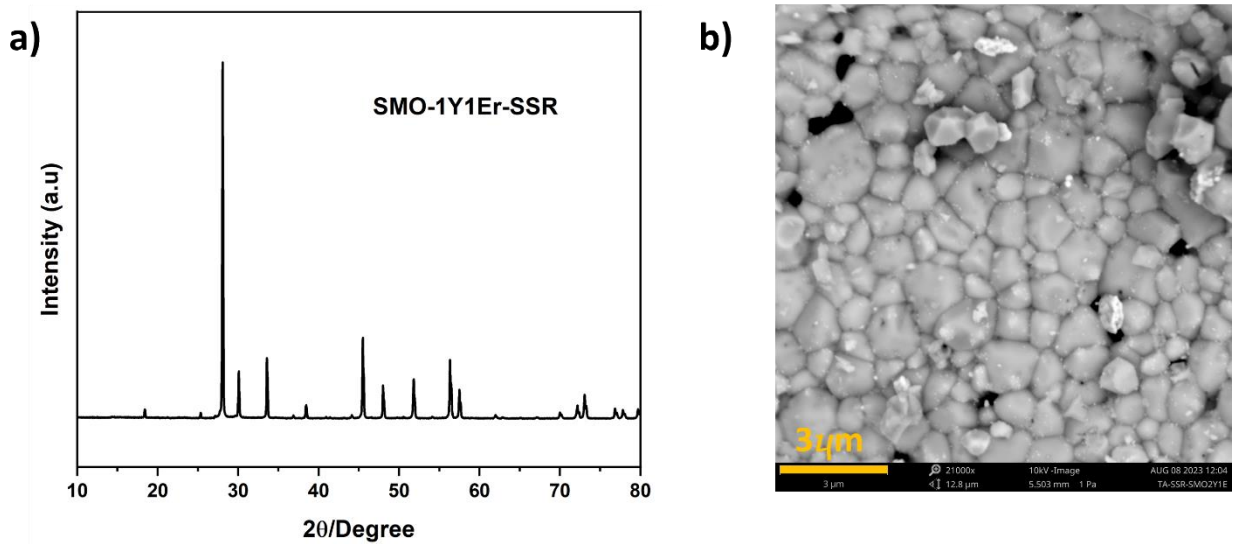

**Figure S5.** Solid state synthesized SMO-1Y1Er: (a) XRD pattern. (b) SEM image.

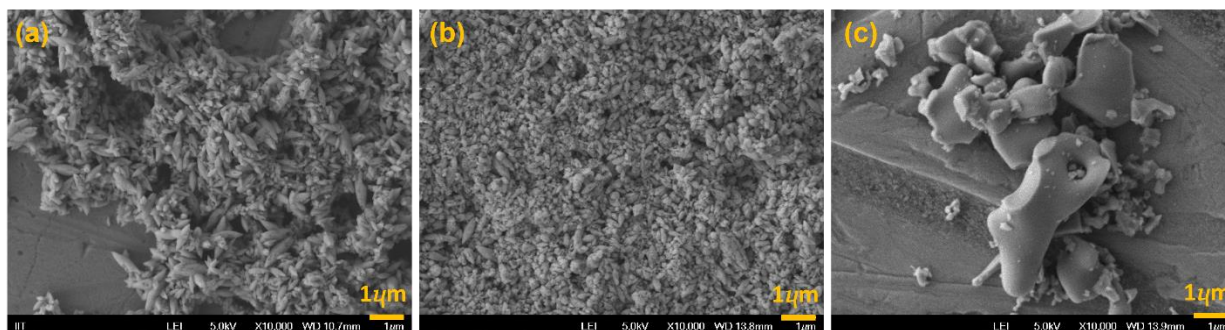

**Figure S6.** FE-SEM images of our hydrothermally synthesized SMO sample doped with 1%  $\text{Yb}^{3+}$  and 1%  $\text{Er}^{3+}$  (a) before and (b) after molten salt annealing at  $500^\circ\text{C}$  for 6 h. (c) Commercial  $\text{NaYF}_4:\text{Yb,Er}$  sample.

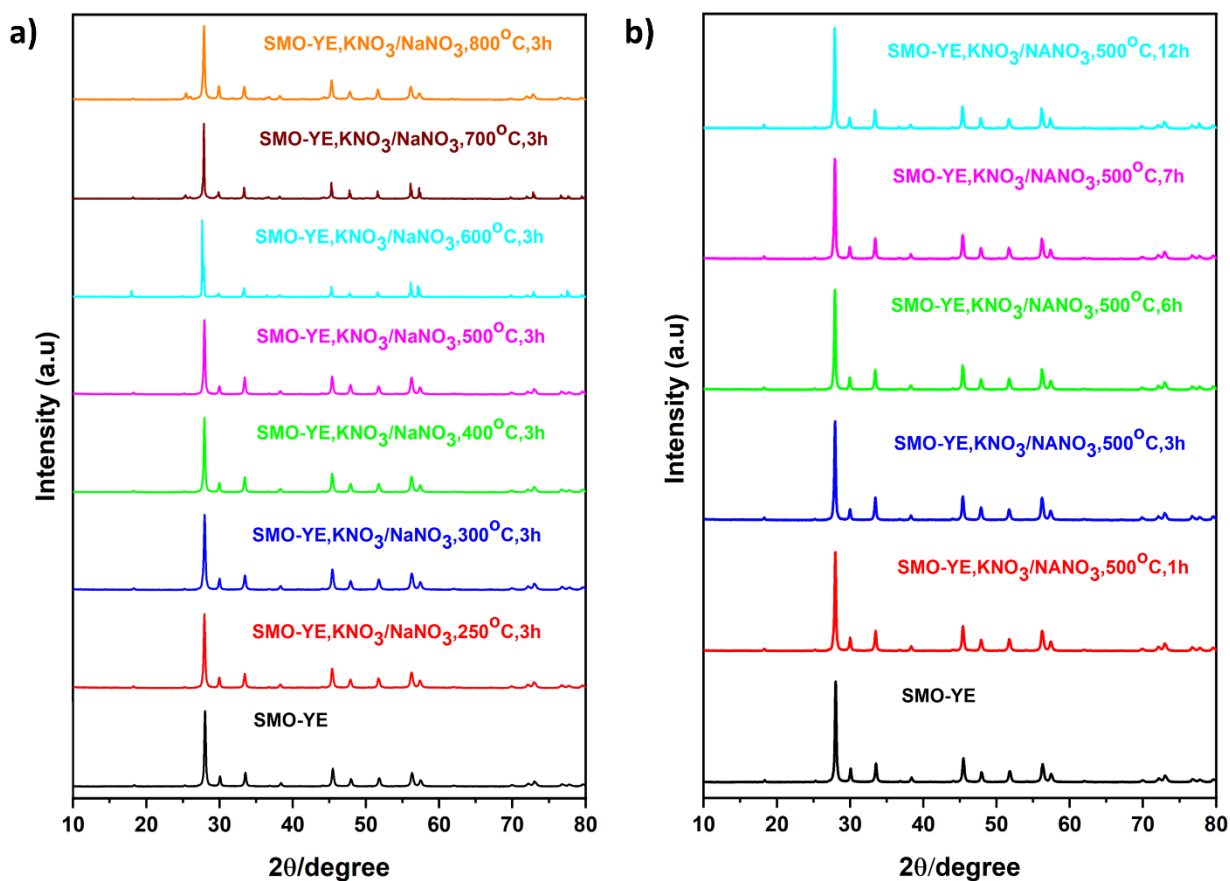

**Figure S7.** XRD patterns of  $\text{SrMoO}_4:1\% \text{Y}^{3+}, 1\% \text{Er}^{3+}$  samples with varying annealing temperature and annealing time in  $\text{KNO}_3/\text{NaNO}_3$  salt mixture. (a) Annealing temperature. (b) Annealing time.

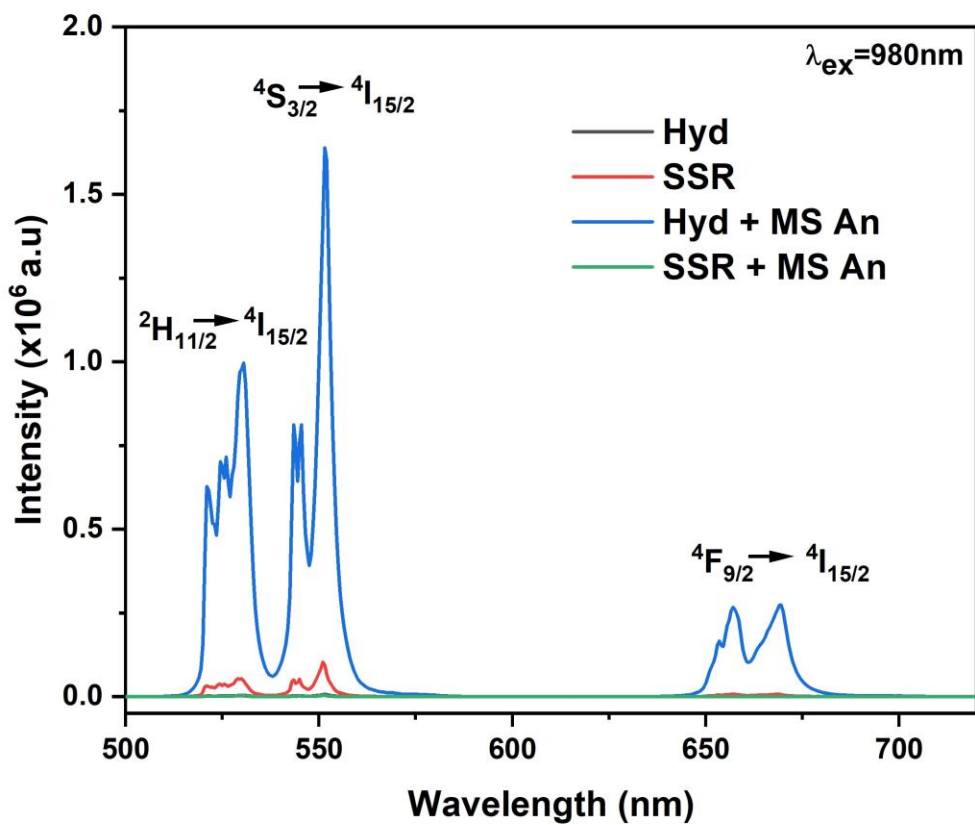

**Figure S8.** Upconversion emission comparison of hydrothermally produced (Hyd), solid state synthesized (SSR), hydrothermally produced followed by molten salt annealed for 500°C, 6h (Hyd+MS An) and solid state synthesized followed by molten salt annealed for 500°C,6h (SSR+MS An) samples of SMO doped with 1% Yb<sup>3+</sup> and 1% Er<sup>3+</sup>.

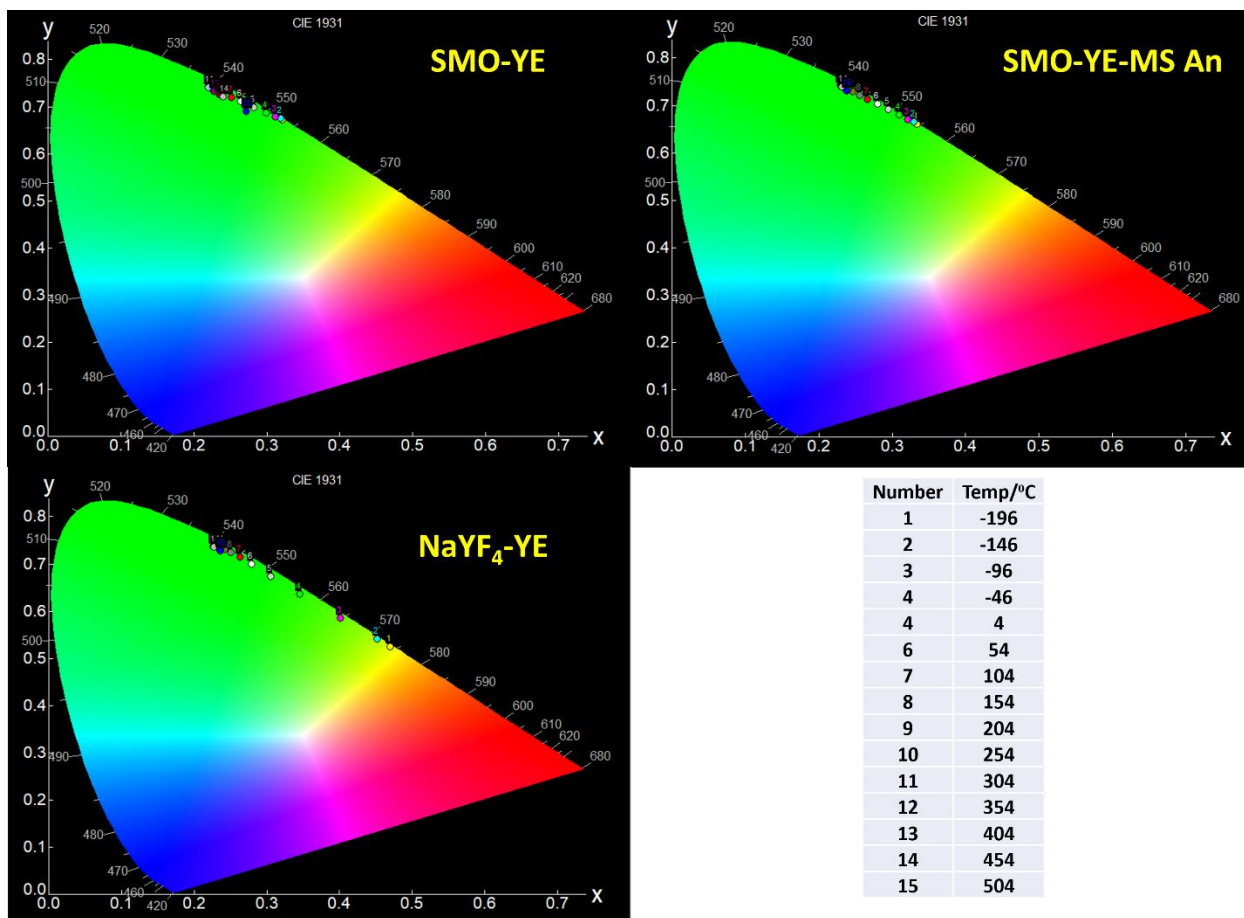

**Figure S9.** CIE color coordinates variation (CIE 1931) with temperature for hydrothermally produced (SMO-YE), molten salt annealed (SMO-YE-MS An) and NaYF<sub>4</sub>:20% Yb<sup>3+</sup>, 3% Er<sup>3+</sup> (NaYF<sub>4</sub>-YE) samples.

**Table S1.** Composition of elements in SrMoO<sub>4</sub> doped with 1% Yb<sup>3+</sup> and 1% Er<sup>3+</sup> by EDS

| Element Number | Element Symbol | Element Name | Atomic Conc. | Weight Conc. |
|----------------|----------------|--------------|--------------|--------------|
| 8              | O              | Oxygen       | 72.55        | 31.52        |
| 42             | Mo             | Molybdenum   | 14.02        | 36.54        |
| 38             | Sr             | Strontium    | 13.43        | 31.94        |
